# Supplementary material
Source: PubMed Central journal article supplement (PMC9726639)

**Supplemental Table 1.** GC-MS Analysis Parameters (Reproduced from Tapper et al., 2018b).

## Supplemental Table 1.

|                       |                                                                                          |
|-----------------------|------------------------------------------------------------------------------------------|
| Column                | HP-5MS (30 m × 0.25 mm I.D. × 0.25 μm film thickness, 5% phenyl-95% methyl-polysiloxane) |
| Carrier gas           | Helium                                                                                   |
| Column flow rate      | 1.2 mL/min at constant flow                                                              |
| Oven temperature      | 40°C for 1 min, 10°C/min to 200°C no hold, then 20°C/min to 310°C hold for 9 min         |
| Injection mode        | Pulsed Splitless                                                                         |
| Injection volume      | 1.0 μL                                                                                   |
| Inlet temp            | 280 °C                                                                                   |
| Inlet pressure        | 8.88 psi                                                                                 |
| Pulse pressure        | 25 psi                                                                                   |
| Purge flow            | 49.8 mL/min                                                                              |
| Purge time            | 0.6 min                                                                                  |
| MS transfer line temp | 280°C                                                                                    |
| Mass range            | 35-500 <i>m/z</i>                                                                        |
| MS source temp        | 230°C                                                                                    |
| MS quad temp          | 150°C                                                                                    |
| Filament energy       | 70 eV                                                                                    |
| Gain factor           | 1.95 (1247 V)                                                                            |

**Supplemental Table 2.** Time course of CBP, DPK and CPK loss and appearance of respective alcohol metabolites CBPOH, BADPK and CPKOH in rt binding cytosols exposed for 20h (4°C) to 20 nmole (-4 log M; 100 μM) or 200 nmole (-3 log M; 1000 μM) of each chemical per vial. Results are expressed as % of nominal for each chemical. Values represent the mean ± SD of two technical replicates from a single experiment.

**Supplemental Table 2.**

| Time (h) | -4 log M (100 μM; 20 nmole nominal)<br>(all values are % nominal) |            | -3 log M (1000 μM; 200 nmole nominal)<br>(all values are % nominal) |             |
|----------|-------------------------------------------------------------------|------------|---------------------------------------------------------------------|-------------|
|          | DPK                                                               | BADPK      | DPK                                                                 | BADPK       |
| 0        | 103.3 ± 9.4                                                       | 0.60 ± 0.1 | 88.6 ± 1.4                                                          | ND          |
| 4        | 83.9 ± 4.5                                                        | 0.61 ± 0.4 | 103.1 ± 2.2                                                         | ND          |
| 20       | 93.8 ± 3.4                                                        | 2.42 ± 0.2 | 95.0 ± 2.9                                                          | 0.73 ± 0.04 |
|          | CPK                                                               | CPKOH      | CPK                                                                 | CPKOH       |
| 0        | 84.0 ± 1.4                                                        | ND         | 87.5 ± 2.8                                                          | ND          |
| 4        | NM                                                                | NM         | NM                                                                  | NM          |
| 20       | 80.0 ± 2.1                                                        | ND         | 77.8 ± 1.1                                                          | ND          |
|          | CBP                                                               | CBPOH      | CBP                                                                 | CBPOH       |
| 0        | 64.4 ± 3.6                                                        | 2.25 ± 0.5 | 69.4 ± 2.1                                                          | 1.32 ± 0.4  |
| 4        | 45.8 ± 4.9                                                        | 2.55 ± 0.3 | 49.3 ± 3.8                                                          | 1.40 ± 0.5  |
| 20       | 42.2 ± 2.6                                                        | 21.6 ± 0.3 | 60.9 ± 2.2                                                          | 6.34 ± 0.2  |

ND=not detected  
NM=not measured

**Supplemental Figure 1.** a) Structure of 26, 27-dinorergost-5-en-3-ol, benzoate (MW=476.7; CAS 58003-48-8), a potential product from the incubation of fish liver slices with CPK and CBP in presence of FBS; b) Identification match was based upon NIST library search comparison of main ions in fragmentation pattern. Top and Bottom panels are MS experimental and literature data, respectively). Match Index= 890 and Reverse Index = 880. High purity Stds were not available for structure confirmation.

**Supplemental Figure 1.**

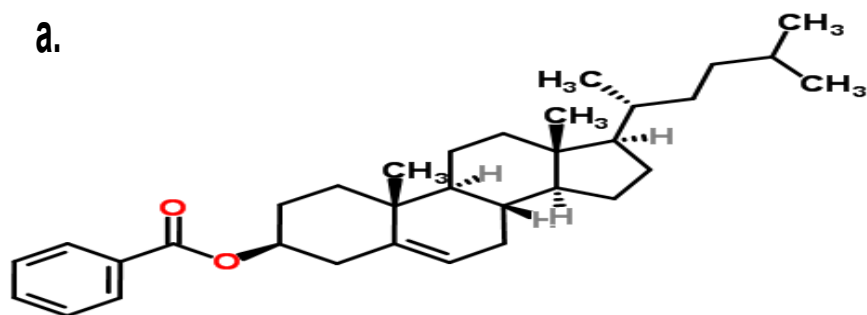

b.

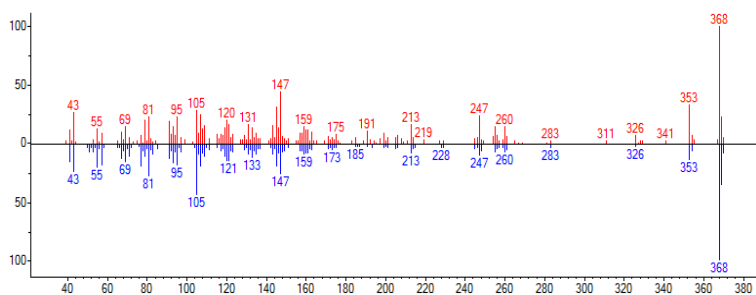

Supplement: NIHMS1648510-supplement-1.pdf [file NIHMS1648510-supplement-1.pdf]
